# Supplementary material
Source: PubMed Central journal article supplement (PMC3874406)
Supplement: NIHMS488275-supplement-SUPPLEMENTARY_INFO.pdf [file NIHMS488275-supplement-SUPPLEMENTARY_INFO.pdf]

## SUPPLEMENTARY INFO

**Table 2**

Exogenous interferences that were investigated by fortification of 1000 ng/mL of each compound into blank urine and LOD samples, respectively

|                                 |                                      |
|---------------------------------|--------------------------------------|
| 11-hydroxy-tetrahydrocannabinol | imipramine                           |
| 2C-B                            | ketamine                             |
| 6-acetylcodeine                 | lorazepam                            |
| 6-acetylmorphine                | methadone                            |
| 7-aminoclonazepam               | methamphetamine                      |
| 7-aminoflunitrazepam            | methylbenzodioxolylbutanamine (MBDB) |
| 7-aminonitrazepam               | methylendioxyamphetamine (MDA)       |
| alprazolam                      | methylendioxyethylamphetamine (MDEA) |
| amphetamine                     | methylendioxymethamphetamine (MDMA)  |
| anhydroecgonine methyl ester    | m-hydroxybenzoylecgonine             |
| acetylsalicylic acid            | m-hydroxycocaine                     |
| benzodioxolylbutanamine (BDB)   | morphine                             |
| benzoylecgonine                 | morphine-3-glucuronide               |
| bromazepam                      | morphine-6-glucuronide               |
| brompheniramine                 | nicotine                             |
| buprenorphine                   | nitrazepam                           |
| caffeine                        | norbenzoylecgonine                   |
| cannabidiol                     | norbuprenorphine                     |
| cannabigerol                    | norcoethylen                         |
| cannabinol                      | norcocaine                           |
| chlorpheniramine                | norcodeine                           |
| clomipramine                    | norcotinine                          |
| clonazepam                      | nordiazepam                          |
| clonidine                       | norfluoxetine                        |
| cocaethylene                    | normorphine                          |
| cocaine                         | noroxycodone                         |
| codeine                         | noroxymorphone                       |
| cotinine                        | oxazepam                             |
| dextromethorphan                | oxycodone                            |
| diazepam                        | oxymorphone                          |
| dihydroxymethamphetamine (HHMA) | parexetine                           |

|                                      |                                                  |
|--------------------------------------|--------------------------------------------------|
| diphenhydramine                      | pentazocine                                      |
| ecgonine ethyl ester                 | phencyclidine                                    |
| ecgonine methyl ester                | phentermine                                      |
| EDDP                                 | phenylpropanolamine                              |
| EMDP                                 | p-hydroxybenzoylecgonine                         |
| ephedrine                            | p-hydroxycocaine                                 |
| ethylamphetamine                     | p-methoxyamphetamine (PMA)                       |
| flunitrazepam                        | p-methoxymethamphetamine (PMMA)                  |
| fluoxetine                           | propoxyphene                                     |
| flurazepam                           | pseudoephedrine                                  |
| hydrocodone                          | cathinone                                        |
| hydromorphone                        | temazepam                                        |
| hydroxyamphetamine                   | tetrahydrocannabinol (THC)                       |
| hydroxycotinine                      | tetrahydrocannabinol carboxylic acid             |
| hydroxymethamphetamine               | tetrahydrocannabinol carboxylic acid glucuronide |
| hydroxymethoxyamphetamine (HMA)      | tetrahydrocannabinol glucuronide                 |
| hydroxymethoxymethamphetamine (HMMA) | tetrahydrocannabinolic acid A (THCA-A)           |
| ibuprofen                            | tylenol                                          |

**Table 3**

Results of the hydrolysis optimization study with four replicates showing the peak areas in the non-hydrolyzed samples and the mean percentage of the peak area ratio of hydrolyzed to non-hydrolyzed samples. The hydrolysis procedure was varied starting from the initial conditions (#1). Optimal conditions, which were used for all later analysis, were: incubation for 2 h at 55 °C with 2000 units enzyme at pH 4.0 (#2).

\* irregular peak shape, precise integration not possible

<sup>1</sup> significantly superior compared to the initial conditions

<sup>2</sup> not significantly different compared to the approach with 4000 units enzyme

|                                 | non-hydrolyzed samples | #1                                                           | #2                 | #3    | #4    | #5                 | #6    | #7    | #8    | #9    |
|---------------------------------|------------------------|--------------------------------------------------------------|--------------------|-------|-------|--------------------|-------|-------|-------|-------|
| Duration (hours)                | -                      | 1                                                            | 2                  | 0.5   | 1     | 1                  | 1     | 1     | 1     | 1     |
| Enzyme (units)                  | -                      | 2000                                                         | 2000               | 2000  | 1000  | 4000               | 2000  | 2000  | 2000  | 2000  |
| Temperature (°C)                | -                      | 55                                                           | 55                 | 55    | 55    | 55                 | 37    | 70    | 55    | 55    |
| pH of buffer                    | -                      | 4.0                                                          | 4.0                | 4.0   | 4.0   | 4.0                | 4.0   | 4.0   | 3.0   | 6.0   |
|                                 | Peak area              | Percentage of peak area ratios hydrolyzed/non-hydrolyzed set |                    |       |       |                    |       |       |       |       |
| JWH-018 5-OH-pentyl glucuronide | 9.13E+06               | 1.1%                                                         | 0.8%               | 3.2%  | 1.2%  | 0.8%               | 4.1%  | 2.1%  | 1.5%  | 33.9% |
| AM2201 4-OH-pentyl              | 4.17E+06               | 222%                                                         | 225%               | 190%  | 211%  | 228%               | 170%  | 214%  | 223%  | 117%  |
| AM2201 6-OH-indole              | 2.66E+06               | 269%                                                         | 271%               | 249%  | 274%  | 256%               | 231%  | 264%  | 270%  | 140%  |
| JWH-018 pentanoic acid          | 1.91E+07               | 99%                                                          | 101%               | 101%  | 104%  | 98%                | 101%  | 96%   | 97%   | *     |
| JWH-018 OH-indole               | 1.49E+04               | 140%                                                         | 131%               | 130%  | 135%  | 130%               | 135%  | 136%  | 137%  | 115%  |
| JWH-018 5-OH-pentyl             | 2.43E+07               | 145%                                                         | 148%               | 144%  | 149%  | 144%               | 143%  | 145%  | 147%  | 128%  |
| JWH-073 butanoic acid           | 4.22E+06               | 104%                                                         | 100%               | 104%  | 105%  | 103%               | 102%  | 103%  | 103%  | 96%   |
| JWH-122 5-OH-pentyl             | 5.88E+05               | 205%                                                         | 208%               | 204%  | 208%  | 206%               | 190%  | 189%  | 191%  | 134%  |
| JWH-210 OH-pentyl               | 1.35E+03               | 908%                                                         | 954%               | 677%  | 807%  | 924%               | 520%  | 909%  | 911%  | 309%  |
| JWH-210 5-OH-indole             | 1.54E+03               | 480%                                                         | 459%               | 463%  | 481%  | 477%               | 453%  | 475%  | 522%  | 350%  |
| JWH-250 OH-pentyl               | 9.11E+04               | 2193%                                                        | 2322% <sup>2</sup> | 1496% | 1803% | 2484% <sup>1</sup> | 1135% | 2322% | 2234% | 354%  |

|                        |          |      |      |      |      |      |      |      |      |      |
|------------------------|----------|------|------|------|------|------|------|------|------|------|
| JWH-250 pentanoic acid | 1.67E+05 | 96%  | 93%  | 95%  | 95%  | 90%  | 100% | 89%  | 100% | 58%  |
| JWH-250 5-OH-indole    | 1.34E+05 | 201% | 196% | 198% | 199% | 200% | 201% | 192% | 203% | 174% |
| RCS-4 pentanoic acid   | 4.08E+03 | 442% | 422% | 416% | 411% | 371% | 302% | 426% | 423% | 133% |
